# Supplementary material for: Role of a 19S Proteasome Subunit- PSMD10Gankyrin in Neurogenesis of Human Neural Progenitor Cells
Source: PubMed Central journal article supplement — Int J Stem Cells. 2019 Aug 31;12(3):463–73. doi: 10.15283/ijsc19007 (PMC6881037; doi:10.15283/ijsc19007), 2019-08-31
Supplement: IJSC-12-463_Supple.pdf [file IJSC-12-463_Supple.pdf]

## Supplementary information

### Methods

#### Construction of networks from microarray gene expression data

In this work, we create networks using different values of gene expression fold change (calculated as a logarithm of the base 2), from PSMD10<sup>Gankyrin</sup> overexpression data. The selection of the right value of fold change for the network needs careful optimization. Choosing too high a value of fold change,  $f$ , might obviously exclude many biological meaningful interactions. Again, setting too low a value of  $f$  would lead to the inclusion of too many interactions in the network. Therefore, we constructed networks at various values of  $f$  like 2, 2.5, 3, 3.5. Networks constructed with  $f$  of value two or more already contain a lot of nodes and edges. Networks constructed with genes possessing values of  $f$  of 4 or more do not contain too many nodes and would lead to exclusion of important information. In our networks, two genes are connected by interactions selected from text-mined interactomes (1). Only interactions above a score of over 0.9 (90% or more) have been chosen to create networks of very high quality. We then analyse these networks using various topological metrics to find important genes and important interactions as detailed below. We find that the list of important interactions attained from the network of genes possessing  $f$  of 3 or more is not remarkably different from the network of genes having  $f$  of 3.5 or more. Therefore, in this work we have restricted ourselves to create networks from upregulated genes induced by PSMD10<sup>Gankyrin</sup> overexpression exceeding a fold change  $\geq 3$  and choose a rather stringent cutoff value of 90% in our text-mined interactomes (1) to mitigate the possibility of selecting spurious or noisy interactions.

#### Topological analysis of networks: important genes and important interactions

We have conducted an extensive topological analysis of the networks constructed by methods outlined above. Both weighted and unweighted networks have been investigated here. However, we find the important conclusions to be essentially similar for both weighted and unweighted networks. Our network is constructed out of genes exhibiting a value of  $f$  of 3 or more and contains 249 genes and 292 edges.

Degree or the number of connections that a node has to other nodes in the network is arguably the most commonly studied metric in network science. However, it is well-known from the theory of complex networks, that other network metrics should also be examined in parallel. In this work, we have also measured node betweenness (2, 3), edge betweenness (4), edge closeness and edge proximity (2), in addition to degree.

Betweenness (2, 4),  $B_k$  of edge (or node),  $k$ , in a network,  $G$ , measures the number of shortest paths passing through  $k$  in the network,  $G$ . Thus, if  $\sigma_{ij}$  is the number of shortest paths in  $G$  from edge (or node),  $i$ , to edge (or node),  $j$ , and  $\sigma_{ij}(k)$  is the number of shortest paths in  $G$  from  $i$  to  $j$  which pass through  $k$ , then,  $B_k = \sum_{i \neq k \neq j} [\sigma_{ij}(k) / \sigma_{ij}]$ . Betweenness is thought to capture the flow of information in a given network. Nodes with low degree but high betweenness usually capture the bottlenecks in a network.

Node closeness,  $C_i$ , of node  $i$ , is the reciprocal of average distance of  $i$  to every other node,  $j$ , in a network,  $G$ , of  $N$  nodes. Thus,  $C_i = (N-1) / \sum_j d_{ij}$ .

Edge proximity (2, 3),  $P_k$ , of an edge,  $k$ , in the network  $G$ , with  $M$  edges, is the inverse of the sum of its shortest distance  $d_{kl}$  to all other edges,  $l$ . Therefore,  $P_k = (M-1) / \sum_l d_{kl}$ . Calculation of edge proximity would require the construction of the line graph in the manner detailed in the earlier report (2, 3).

#### Virus production and hNPCs transduction

The HEK293-FT cells were transfected with pTRIPZ-empty vector or pTRIPZ-3XFlag- PSMD10<sup>Gankyrin</sup> construct with the packaging vectors (PAX2 and pMD2G) at 4 : 3 : 1 ratio. Media was collected at 48 h and 72 h post-transfection, filtered with 0.22  $\mu$ M syringe-filter (*Millipore*) and ultracentrifuged at 30,000 rpm, 4°C for 90 min. The virus pellet was resuspended in fresh Neural Stem Cells maintenance media and stored at -80°C for transduction purpose. The virus titer was calculated by transducing HEK293 cells with pTRIPZ empty vector virus and determined the % of RFP +ve cells by FACS analysis. By using the formula [Virus Titer=(No. of cell seeded X% of cell RFP+ve) X dilution factor] virus titer was calculated. hNPCs were transduced with the virus particle in presence of polybrene (10  $\mu$ g/mL: *Sigma*). For RFP or Flag- PSMD10<sup>Gankyrin</sup> expression, cells were induced with 1  $\mu$ g/mL of doxycycline (*Sigma*).

## Materials

### Antibodies

Primary antibodies: **anti-PSMD10<sup>Gankyrin</sup>** 1 : 1000 (mouse monoclonal, *Sigma* and rabbit polyclonal, *Sigma*), **anti-FLAG** 1 : 8000 (mouse monoclonal, *Sigma*), **anti- $\beta$ -actin** in 1 : 2000 (mouse monoclonal, *Sigma*), **anti- $\alpha$ -tubulin** 1 : 2000 (mouse monoclonal, *Sigma*), **anti- $\beta$ 7** 1 : 1000 (mouse monoclonal, *Biomol*), **anti- $\alpha$ 4** in 1 : 1000 (mouse monoclonal, *Biomol*), **anti- $\alpha$ 5** in 1 : 1000 (mouse monoclonal, *Biomol*), **anti-Rpt6** 1 : 1000 (mouse monoclonal, *Biomol*), **anti- $\beta$ -III tubulin** 1 : 1000/1 : 100 (WB/IF) (*Millipore* polyclonal mouse, polyclonal chicken), **anti-GFAP** 1 : 1000/1 : 100 (WB/IF) (*Millipore* polyclonal rabbit), **anti-*nestin*** 1 : 1000/1 : 100 (WB/IF) (*Millipore* monoclonal mouse), **anti-*nestin*** 1 : 1000/1 : 300 (WB/IF) (*Sigma* polyclonal rabbit), **anti-SOX2** 1 : 1000/1 : 100 (WB/IF) (*Millipore* polyclonal rabbit), **anti-Musashi** 1 : 1000/1 : 100 (WB/IF) (*Millipore* polyclonal rabbit), **anti-Oligodendrocyte marker O1** 1 : 1000 (*Millipore* monoclonal mouse), **anti- $\beta$ -catenin** 1 : 1000 (mouse monoclonal, *Cell signalling*),

Secondary antibodies; anti-mouse-HRP (*GE-healthcare*), anti-rabbit-HRP (*GE healthcare*), **anti-mouse-FITC** (*Santa Cruz*), **anti-mouse-Alexafluor568** (*Invitrogen*), **anti-mouse-TR** (*Santa Cruz*), **anti-rabbit-Alexafluor488** (*Invitrogen*), **anti-rabbit-Alexafluor568** (*Invitrogen*), **anti-chicken-Alexa633** (*Invitrogen*) were used.

### List of cloning primer:

|                                                   |                                                                         |
|---------------------------------------------------|-------------------------------------------------------------------------|
| <b>PSMD10<sup>Gankyrin</sup></b> in pCMV10-3XFlag | Fw: AAGCTTATGGACTACAAAGACCATG<br>Rv: GAATTCCTAACCTCCACCATTCTCTTG        |
| <b>FLAG-PSMD10<sup>Gankyrin</sup></b> in pTRIPZ   | Fw: ACCGGTCGCCACCATGGACTACAAAGACCATG<br>Rv: GAATTCCTAACCTCCACCATTCTCTTG |

### List of real time primer:

| Primer Name         | Primer Sequence                 |
|---------------------|---------------------------------|
| GAPDH-Fw            | 5'-ATCGTGGGAAGGACTCATGACC-3'    |
| GAPDH-Rv            | 5'-AGGGATGATGTTCTGGAGAGC-3'     |
| $\alpha$ 4-Fw       | 5'- CGCTACATCGCCAGTCTGAAG -3'   |
| $\alpha$ 4-Rv       | 5'- GAGCCTAGGAGTGCCATCAAAG -3'  |
| $\beta$ 1- Fw       | 5'- AATCGAGTGACTGACAAGCTGAC -3' |
| $\beta$ 1-Rv        | 5'- CAGTGGAGGCTCATTGAGTTC -3'   |
| $\beta$ 2-Fw        | 5'- TGAAGGATGGTTGTTGCTGAC -3'   |
| $\beta$ 2-Rv        | 5'- GGAAGAAATGAGCTGGGTTGTC -3'  |
| $\beta$ 5-Fw        | 5'- CGGCAATGTCCAATCTATGAGC -3'  |
| $\beta$ 5-Rv        | 5'- GCCTCTTATCCCAGCCACAG -3'    |
| $\beta$ 7-Fw        | 5'- CTCAGTCCTCGGCGTTAAGTTC -3'  |
| $\beta$ 7-Rv        | 5'- GCATGGTACTGTTGTTGACTCG -3'  |
| PSMD4 Fw            | 5'- CTACATACTGTCCAACCCAA -3'    |
| PSMD4-Rv            | 5'- AGTTTCACCAGATCCTTCTC -3'    |
| PSMD9-Fw            | 5'-AAGGCCAACTATGACGTGCTG-3'     |
| PSMD9-Rv            | 5'-ATATGATGTTGTGCTGGCG-3'       |
| PSMD10-Fw           | 5'- GCAGCTTCGAAAAACAGGCA -3'    |
| PSMD10-Rv           | 5'- GGATGTTTGTGGATGCTTTG -3'    |
| NGN1-Fw             | 5'- GACCTATCCGGCTTCCTCAC -3'    |
| NGN1-Rv             | 5'- TCCTGCTCGTCGTCCTGTG -3'     |
| NRG1-Fw             | 5'-AGGTGAGAACGCCAAGTC -3'       |
| NRG1-Rv             | 5'-TCTCCTTCTCCGACATTTTAC -3'    |
| $\beta$ -catenin-Fw | 5'-CTGGTGCCACTACCACAGCTC -3'    |
| $\beta$ -catenin-Rv | 5'-GCTCGTACCCTCTGAGCTCG -3'     |

1. Iossifov I, Rodriguez-Esteban R, Mayzus I, Millen KJ, Rzhetsky A. Looking at cerebellar malformations through text-mined interactomes of mice and humans. *PLoS Comput Biol.* 2009;5(11):e1000559. doi: 10.1371/journal.pcbi.1000559. PubMed PMID: 19893633; PubMed Central PMCID: PMC2767227.
2. Kaur Grewal R, Mitra D, Roy S. Mapping networks of light-dark transition in LOV photoreceptors. *Bioinformatics.* 2015;31(22):3608-16. doi: 10.1093/bioinformatics/btv429. PubMed PMID: 26209799.
3. Banerjee SJ, Sinha S, Roy S. Slow poisoning and destruction of networks: edge proximity and its implications for biological and infrastructure networks. *Phys Rev E Stat Nonlin Soft Matter Phys.* 2015;91(2):022807. doi: 10.1103/PhysRevE.91.022807. PubMed PMID: 25768552.
4. Girvan M, Newman ME. Community structure in social and biological networks. *Proc Natl Acad Sci U S A.* 2002;99(12):7821-6. doi: 10.1073/pnas.122653799. PubMed PMID: 12060727; PubMed Central PMCID: PMC122977.

**Table S1.** KEGG pathway\_GSEA over representation (Bold letter corresponds to the pathways related to neurogenesis):

| Gene Set Name                                       | # Genes<br>in<br>Gene<br>Set (K) | Description                                    | # Genes<br>in<br>Overlap<br>(k) | k/K           | p-value         | FDR<br>q-value  |
|-----------------------------------------------------|----------------------------------|------------------------------------------------|---------------------------------|---------------|-----------------|-----------------|
| <b>KEGG_NEUROACTIVE_LIGAND_RECEPTOR_INTERACTION</b> | <b>272</b>                       | <b>Neuroactive ligand-receptor interaction</b> | <b>20</b>                       | <b>0.0735</b> | <b>3.25E-07</b> | <b>5.92E-05</b> |
| KEGG_AMYOTROPHIC_LATERAL_SCLEROSIS_ALS              | 53                               | Amyotrophic lateral sclerosis (ALS)            | 9                               | 0.1698        | 6.36E-07        | 5.92E-05        |
| KEGG_CALCIIUM_SIGNALING_PATHWAY                     | 178                              | Calcium signaling pathway                      | 14                              | 0.0787        | 8.64E-06        | 5.36E-04        |
| KEGG_PATHWAYS_IN_CANCER                             | 328                              | Pathways in cancer                             | 19                              | 0.0579        | 2.01E-05        | 9.36E-04        |
| <b>KEGG_WNT_SIGNALING_PATHWAY</b>                   | <b>151</b>                       | <b>Wnt signaling pathway</b>                   | <b>12</b>                       | <b>0.0795</b> | <b>3.38E-05</b> | <b>1.26E-03</b> |
| KEGG_FOCAL_ADHESION                                 | 201                              | Focal adhesion                                 | 13                              | 0.0647        | 1.35E-04        | 4.18E-03        |
| KEGG_COLORECTAL_CANCER                              | 62                               | Colorectal cancer                              | 7                               | 0.1129        | 1.71E-04        | 4.53E-03        |
| KEGG_LONG_TERM_POTENTIATION                         | 70                               | Long-term potentiation                         | 7                               | 0.1           | 3.65E-04        | 8.48E-03        |
| KEGG_SMALL_CELL_LUNG_CANCER                         | 84                               | Small cell lung cancer                         | 7                               | 0.0833        | 1.10E-03        | 2.27E-02        |
| KEGG_MAPK_SIGNALING_PATHWAY                         | 267                              | MAPK signaling pathway                         | 13                              | 0.0487        | 1.93E-03        | 3.59E-02        |

**Table S2.** Reactome signaling\_GSEA over representation (Bold letter corresponds to the signaling pathways related to neurogenesis):

| Gene Set Name                                                                                                         | # Genes<br>in<br>Gene<br>Set (K) | Description                                                                                                             | # Genes<br>in<br>Overlap<br>(k) | k/K           | p-value         | FDR<br>q-value  |
|-----------------------------------------------------------------------------------------------------------------------|----------------------------------|-------------------------------------------------------------------------------------------------------------------------|---------------------------------|---------------|-----------------|-----------------|
| REACTOME_SIGNALING_BY_GPCR                                                                                            | 920                              | Genes involved in Signaling by GPCR                                                                                     | 52                              | 0.0565        | 4.50E-12        | 3.03E-09        |
| REACTOME_GPCR_DOWNSTREAM_<br>SIGNALING                                                                                | 805                              | Genes involved in GPCR downstream<br>signaling                                                                          | 44                              | 0.0547        | 5.78E-10        | 1.95E-07        |
| REACTOME_GPCR_LIGAND_BINDING                                                                                          | 408                              | Genes involved in GPCR ligand binding                                                                                   | 29                              | 0.0711        | 1.70E-09        | 3.81E-07        |
| <b>REACTOME_NEURONAL_SYSTEM</b>                                                                                       | <b>279</b>                       | <b>Genes involved in Neuronal System</b>                                                                                | <b>23</b>                       | <b>0.0824</b> | <b>5.16E-09</b> | <b>8.69E-07</b> |
| REACTOME_CLASS_A1_RHODOPSIN_<br>LIKE_RECEPTORS                                                                        | 305                              | Genes involved in Class A/1<br>(Rhodopsin-like receptors)                                                               | 23                              | 0.0754        | 2.74E-08        | 3.69E-06        |
| <b>REACTOME_NEUROTRANSMITTER_<br/>RECEPTOR_BINDING_AND_<br/>DOWNSTREAM_TRANSMISSION_<br/>IN_THE_POSTSYNAPTIC_CELL</b> | <b>137</b>                       | <b>Genes involved in Neurotransmitter<br/>Receptor Binding And Downstream<br/>Transmission In The Postsynaptic Cell</b> | <b>14</b>                       | <b>0.1022</b> | <b>3.83E-07</b> | <b>4.31E-05</b> |
| <b>REACTOME_TRANSMISSION_<br/>ACROSS_CHEMICAL_SYNAPSES</b>                                                            | <b>186</b>                       | <b>Genes involved in Transmission across<br/>Chemical Synapses</b>                                                      | <b>16</b>                       | <b>0.086</b>  | <b>6.13E-07</b> | <b>5.91E-05</b> |
| REACTOME_PEPTIDE_LIGAND_<br>BINDING_RECEPTORS                                                                         | 188                              | Genes involved in Peptide<br>ligand-binding receptors                                                                   | 16                              | 0.0851        | 7.08E-07        | 5.96E-05        |
| REACTOME_G_ALPHA_I_<br>SIGNALLING_EVENTS                                                                              | 195                              | Genes involved in G alpha (i) signalling<br>events                                                                      | 16                              | 0.0821        | 1.15E-06        | 8.62E-05        |
| REACTOME_ACTIVATION_OF_NMDA_<br>RECEPTOR_UPON_Glutamate_<br>BINDING_AND_POSTSYNAPTIC_EVENTS                           | 37                               | Genes involved in Activation of NMDA<br>receptor upon glutamate binding and<br>postsynaptic events                      | 7                               | 0.1892        | 5.38E-06        | 3.48E-04        |

**Table S3.** David functional analysis: (Bold letter corresponds to the cellular part related to neurogenesis):

| Category            | Term                                | Count     | %               | p-Value         | List Total | Pop Hits    | Pop Total    | Fold Enrichment | Bonferroni      | Benjamini       | FDR             |
|---------------------|-------------------------------------|-----------|-----------------|-----------------|------------|-------------|--------------|-----------------|-----------------|-----------------|-----------------|
| <b>GOTERM_ CC_2</b> | <b>GO:0097458~ neuron part</b>      | <b>50</b> | <b>12.43781</b> | <b>3.50E-05</b> | <b>363</b> | <b>1333</b> | <b>17877</b> | <b>1.847259</b> | <b>0.003248</b> | <b>0.003248</b> | <b>0.038286</b> |
| GOTERM_ CC_2        | GO:0044459~plasma membrane part     | 79        | 19.65174        | 2.83E-04        | 363        | 2635        | 17877        | 1.476504        | 0.026024        | 0.013098        | 0.309918        |
| GOTERM_ CC_2        | GO:0005886~ plasma membrane         | 135       | 33.58209        | 3.69E-04        | 363        | 5141        | 17877        | 1.293225        | 0.033769        | 0.011386        | 0.403565        |
| GOTERM_ CC_2        | GO:0071944~ cell periphery          | 136       | 33.83085        | 6.69E-04        | 363        | 5256        | 17877        | 1.2743          | 0.060357        | 0.015443        | 0.730154        |
| GOTERM_ CC_2        | GO:0098590~plasma membrane region   | 34        | 8.457711        | 0.001434        | 363        | 936         | 17877        | 1.788921        | 0.12496         | 0.026344        | 1.559043        |
| <b>GOTERM_ CC_2</b> | <b>GO:0098793~ presynapse</b>       | <b>15</b> | <b>3.731343</b> | <b>0.001933</b> | <b>363</b> | <b>282</b>  | <b>17877</b> | <b>2.619571</b> | <b>0.164647</b> | <b>0.029538</b> | <b>2.095433</b> |
| GOTERM_ CC_2        | GO:0042995~ cell projection         | 56        | 13.93035        | 0.002235        | 363        | 1846        | 17877        | 1.493978        | 0.18784         | 0.029285        | 2.419404        |
| <b>GOTERM_ CC_2</b> | <b>GO:0008021~ synaptic vesicle</b> | <b>8</b>  | <b>1.99005</b>  | <b>0.014866</b> | <b>363</b> | <b>127</b>  | <b>17877</b> | <b>3.102232</b> | <b>0.751654</b> | <b>0.159801</b> | <b>15.12314</b> |

**Table S4.** David functional tool: (Bold letter corresponds to the functions related to neurogenesis):

| Category           | Term                               | Count     | %               | p-Value         | List Total | Pop Hits   | Pop Total    | Fold Enrichment | Bonferroni | Benjamini       | FDR             |
|--------------------|------------------------------------|-----------|-----------------|-----------------|------------|------------|--------------|-----------------|------------|-----------------|-----------------|
| UP_KEYWORDS        | Glycoprotein                       | 123       | 30.59701        | 5.83E-05        | 402        | 4551       | 20581        | 1.38369         | 0.018439   | 0.018439        | 0.078661        |
| UP_KEYWORDS        | Calcium                            | 34        | 8.457711        | 2.53E-04        | 402        | 877        | 20581        | 1.984814        | 0.07764    | 0.039604        | 0.34114         |
| UP_KEYWORDS        | Cell membrane                      | 88        | 21.89055        | 4.88E-04        | 402        | 3175       | 20581        | 1.41899         | 0.144292   | 0.050616        | 0.656705        |
| UP_KEYWORDS        | Cleavage on pair of basic residues | 15        | 3.731343        | 0.001993        | 402        | 294        | 20581        | 2.612067        | 0.470848   | 0.147106        | 2.6553          |
| UP_KEYWORDS        | Cell adhesion                      | 20        | 4.975124        | 0.002886        | 402        | 479        | 20581        | 2.137642        | 0.602263   | 0.168391        | 3.823287        |
| UP_KEYWORDS        | Cell junction                      | 25        | 6.218905        | 0.00353         | 402        | 675        | 20581        | 1.896167        | 0.676387   | 0.171414        | 4.658345        |
| UP_KEYWORDS        | Transducer                         | 30        | 7.462687        | 0.005727        | 402        | 899        | 20581        | 1.708449        | 0.839909   | 0.230271        | 7.453784        |
| UP_KEYWORDS        | Secreted                           | 55        | 13.68159        | 0.006232        | 402        | 1965       | 20581        | 1.432981        | 0.863871   | 0.22063         | 8.086078        |
| UP_KEYWORDS        | Ion channel                        | 15        | 3.731343        | 0.011216        | 402        | 359        | 20581        | 2.13913         | 0.972629   | 0.329551        | 14.11353        |
| UP_KEYWORDS        | Palmitate                          | 14        | 3.482587        | 0.011381        | 402        | 324        | 20581        | 2.212195        | 0.97404    | 0.305887        | 14.30553        |
| UP_KEYWORDS        | Membrane                           | 169       | 42.0398         | 0.012687        | 402        | 7494       | 20581        | 1.154552        | 0.982973   | 0.309452        | 15.82018        |
| UP_KEYWORDS        | G-protein coupled receptor         | 27        | 6.716418        | 0.01437         | 402        | 842        | 20581        | 1.641694        | 0.990119   | 0.31939         | 17.73513        |
| UP_KEYWORDS        | Heme                               | 8         | 1.99005         | 0.014946        | 402        | 132        | 20581        | 3.102819        | 0.991801   | 0.308935        | 18.38163        |
| UP_KEYWORDS        | Lipoprotein                        | 27        | 6.716418        | 0.016562        | 402        | 852        | 20581        | 1.622425        | 0.995145   | 0.316512        | 20.16962        |
| UP_KEYWORDS        | Defensin                           | 5         | 1.243781        | 0.018432        | 402        | 52         | 20581        | 4.922742        | 0.997354   | 0.326753        | 22.19245        |
| UP_KEYWORDS        | Signal                             | 99        | 24.62687        | 0.021174        | 402        | 4160       | 20581        | 1.218379        | 0.998916   | 0.347334        | 25.07359        |
| UP_KEYWORDS        | Monooxygenase                      | 6         | 1.492537        | 0.028792        | 402        | 88         | 20581        | 3.490672        | 0.99991    | 0.422009        | 32.56765        |
| UP_KEYWORDS        | Receptor                           | 44        | 10.94527        | 0.030492        | 402        | 1648       | 20581        | 1.366897        | 0.999949   | 0.42236         | 34.14311        |
| UP_KEYWORDS        | Disease mutation                   | 63        | 15.67164        | 0.038119        | 402        | 2550       | 20581        | 1.264855        | 0.999996   | 0.479265        | 40.79761        |
| UP_KEYWORDS        | Transmembrane helix                | 127       | 31.59204        | 0.038985        | 402        | 5634       | 20581        | 1.154057        | 0.999997   | 0.469673        | 41.5128         |
| UP_KEYWORDS        | Transmembrane                      | 127       | 31.59204        | 0.042302        | 402        | 5651       | 20581        | 1.150585        | 0.999999   | 0.481377        | 44.17769        |
| UP_KEYWORDS        | Growth arrest                      | 3         | 0.746269        | 0.047172        | 402        | 18         | 20581        | 8.532753        | 1          | 0.503741        | 47.88728        |
| <b>UP_KEYWORDS</b> | <b>Synapse</b>                     | <b>13</b> | <b>3.233831</b> | <b>0.048113</b> | <b>402</b> | <b>357</b> | <b>20581</b> | <b>1.864299</b> | <b>1</b>   | <b>0.495354</b> | <b>48.57715</b> |
| <b>UP_KEYWORDS</b> | <b>Neurogenesis</b>                | <b>10</b> | <b>2.487562</b> | <b>0.057013</b> | <b>402</b> | <b>250</b> | <b>20581</b> | <b>2.047861</b> | <b>1</b>   | <b>0.541715</b> | <b>54.6969</b>  |
| UP_KEYWORDS        | Serine protease                    | 7         | 1.741294        | 0.05811         | 402        | 141        | 20581        | 2.541671        | 1          | 0.534157        | 55.40262        |
| UP_KEYWORDS        | Extracellular matrix               | 10        | 2.487562        | 0.066699        | 402        | 258        | 20581        | 1.984361        | 1          | 0.571266        | 60.58619        |
| UP_KEYWORDS        | Protease                           | 17        | 4.228856        | 0.067406        | 402        | 544        | 20581        | 1.599891        | 1          | 0.561545        | 60.98677        |
| UP_KEYWORDS        | Ligand-gated ion channel           | 5         | 1.243781        | 0.070963        | 402        | 80         | 20581        | 3.199782        | 1          | 0.567681        | 62.94677        |
| UP_KEYWORDS        | Voltage-gated channel              | 7         | 1.741294        | 0.073636        | 402        | 150        | 20581        | 2.389171        | 1          | 0.568877        | 64.35893        |
| UP_KEYWORDS        | Potassium transport                | 6         | 1.492537        | 0.076655        | 402        | 116        | 20581        | 2.648096        | 1          | 0.571743        | 65.89426        |
| UP_KEYWORDS        | Polymorphism                       | 250       | 62.18905        | 0.077621        | 402        | 12043      | 20581        | 1.062786        | 1          | 0.56458         | 66.37227        |
| UP_KEYWORDS        | DNA-binding                        | 50        | 12.43781        | 0.077683        | 402        | 2050       | 20581        | 1.248696        | 1          | 0.553421        | 66.40308        |
| UP_KEYWORDS        | Methylation                        | 27        | 6.716418        | 0.083821        | 402        | 1001       | 20581        | 1.380925        | 1          | 0.570982        | 69.29664        |
| UP_KEYWORDS        | Alternative splicing               | 221       | 54.97512        | 0.090965        | 402        | 10587      | 20581        | 1.06871         | 1          | 0.591317        | 72.37335        |
| UP_KEYWORDS        | EGF-like domain                    | 9         | 2.238806        | 0.095161        | 402        | 238        | 20581        | 1.936003        | 1          | 0.598045        | 74.04459        |
| UP_KEYWORDS        | Activator                          | 19        | 4.726368        | 0.097436        | 402        | 661        | 20581        | 1.471609        | 1          | 0.596831        | 74.91089        |

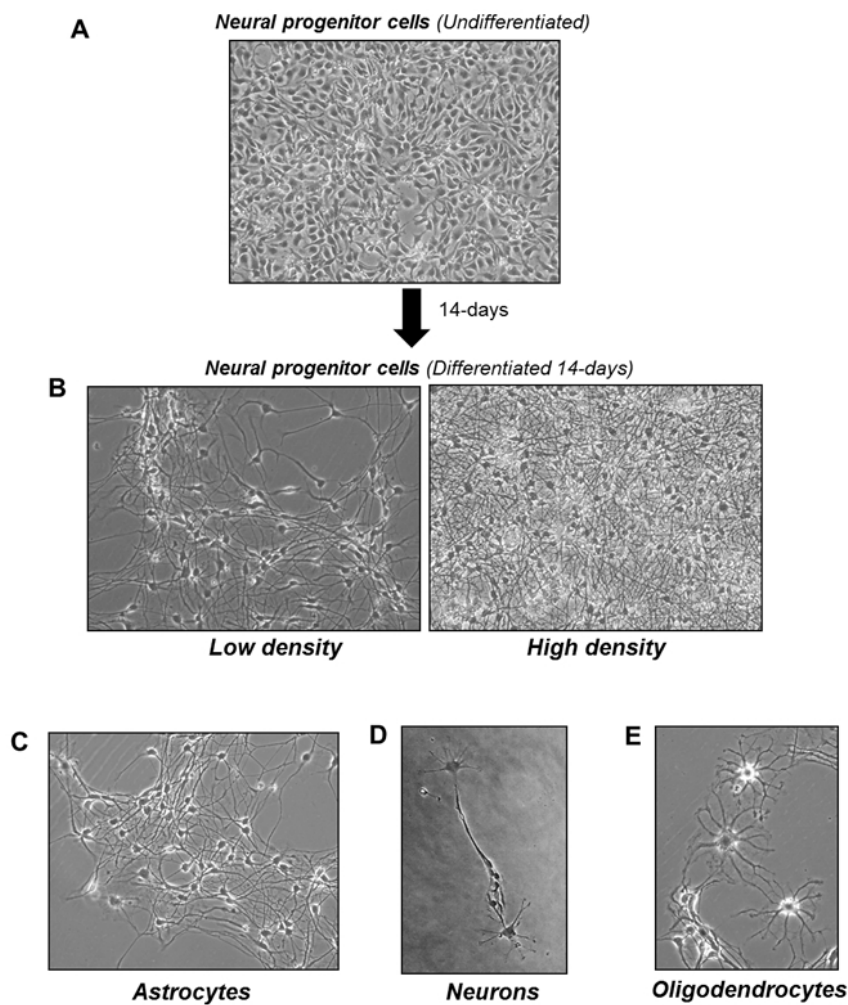

**Fig. S1.** Human neural progenitor cells were differentiated into Astrocytes, Neurons and oligodendrocytes: (A) Phase Contrast image of human Neural progenitor cells. Cells were grown on Laminin coated plate in Neural stem cell maintenance media with supplements EGF (20 ng/mL) and FGF (20 ng/mL) for a period of 72 hr. Image shows >90% confluent mono layer cells. (B) hNPCs were grown on Laminin coated plates till they reached ~80% confluence. Then media was replaced with fresh DF media with changes on alternate days until 12th day of differentiation. Images were taken using a phase-contrast microscope. Differentiated cells (C) astrocytes showing the network like structure, (D) neurons showing the axon and cell body with dendritic processes and (E) oligodendrocytes dendritic net like phenotype.



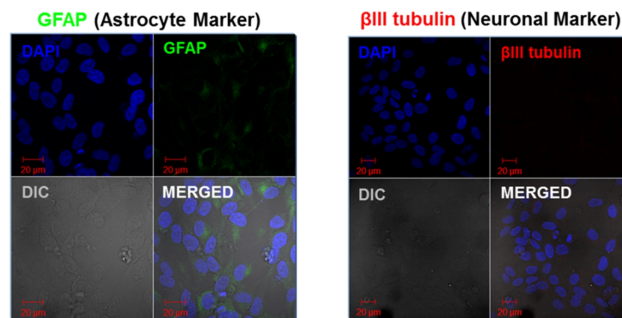

**Fig. S2.** Human neural progenitor cells do not express differentiation markers: hNPCs were grown on laminin coated glass coverslips to ~80% confluency. Immunofluorescence was performed following the protocol described in materials and methods. Cells show negative/minimal expression of GFAP (in green) and  $\beta$ -III tubulin (in red), DAPI was (in blue) used for nuclear staining. Images were acquired in Laser confocal microscope (Zeiss LSM meta-510).

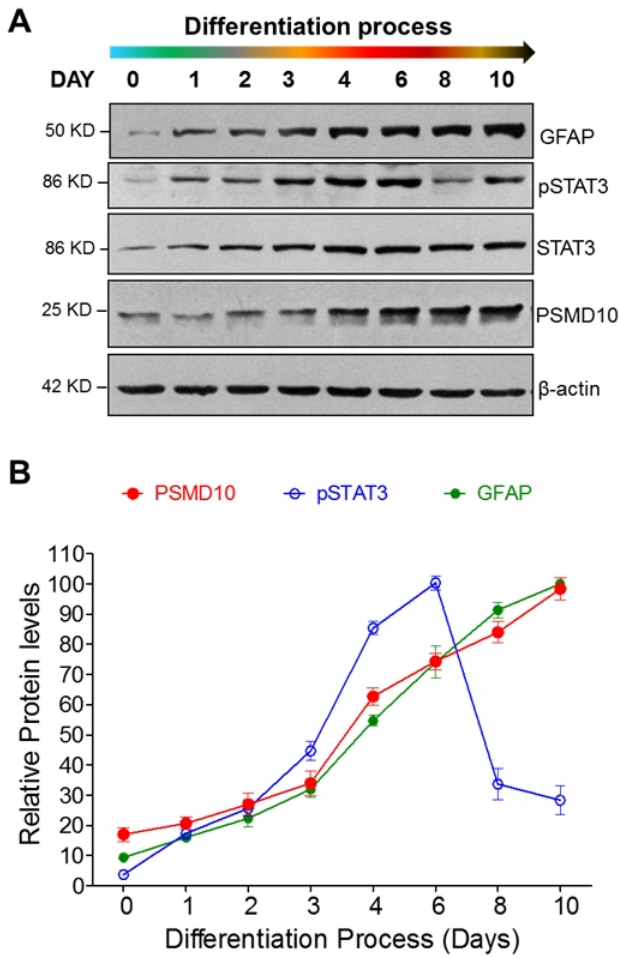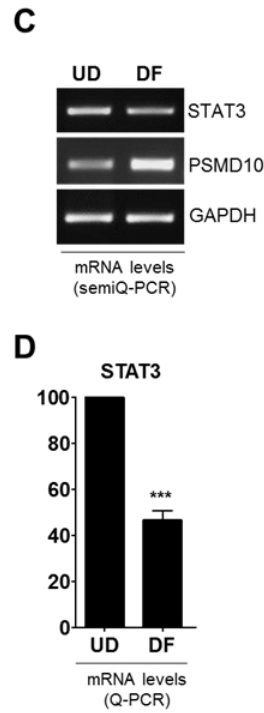

**Fig. S3.** STAT3 expression and phosphorylation during the hNPCs differentiation process. (A) Progenitor cells grown on laminin coated plates to ~80% confluency, were differentiated as described in Fig. 2 with a minor change; differentiation was stopped at day 10. Cells at each day of differentiation were collected, lysed and analyzed by western blot. (B) Line graphs show the expression levels of depicted proteins from Fig. 3J at each day during the differentiation process. Data represents the average protein levels of two independent (biological repeat) experiments. (C) Semi-Q PCR gel image shows the mRNA levels of PSMD10<sup>Gankyrin</sup> and STAT3 in the progenitor cells (UD) and differentiated cells. (D) Graph represents mRNA levels of STAT3 in the progenitor cells (UD) and differentiated cells (DF) measured by the Real-time PCR. Data represents the average fold increase of mRNA levels (normalized with GAPDH) of three independent experiments with  $\pm$ SEM.

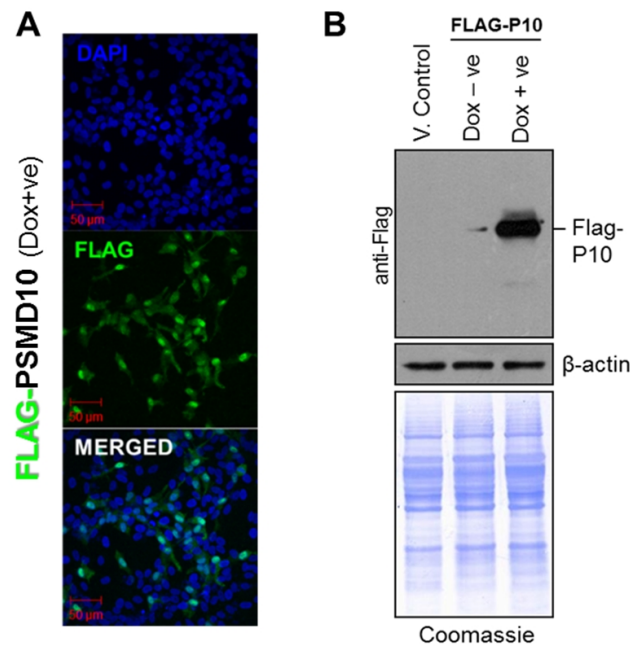

**Fig. S4.** Trans-expression of Flag-PSMD10<sup>Gankyrin</sup> in hNPCs by lentiviral transduction. hNPCs were grown on Laminin coated glass coverslips to ~30% confluency and transduced with virus particles carrying of pTRIPZ-3XFlag- PSMD10<sup>Gankyrin</sup>. To induce the expression of PSMD10<sup>Gankyrin</sup>, cells were treated either with doxycycline (1  $\mu$ g/mL) for 48 hr or left untreated. (A) Immunofluorescence was performed using anti-Flag antibody after 48 h of transduction following the protocol described in materials and methods. Cells show expression of Flag-PSMD10<sup>Gankyrin</sup> (in green). DAPI (in blue) was used for nuclear staining. Images were acquired in Laser confocal microscope (Zeiss LSM meta-510). (B) Cell lysate were prepared after 48 h of transduction and analyzed by WB.
